# Supplementary material for: Scenarios of availability of water due to overexploitation of the aquifer in the basin of Laguna de Santiaguillo, Durango, Mexico
Source: PeerJ. 2019 Jul 15;7:e6814. doi: 10.7717/peerj.6814 (PMC6637934; doi:10.7717/peerj.6814)
Supplement: Supplemental Information 1 [file peerj-07-6814-s001.xlsx]

## Sheet: Surface balance
	REGION		LAGUNA DE SANTIAGUILLO	LAGUNA NORTE	LAGUNA NORTE	LAGUNA NORTE	LAGUNA NORTE	LAGUNA NORTE	LAGUNA NORTE	LAGUNA NORTE	LAGUNA NORTE	LAGUNA NORTE	LAGUNA NORTE	LAGUNA NORTE	LAGUNA NORTE	LAGUNA SUR	LAGUNA SUR	LAGUNA SUR	LAGUNA SUR	LAGUNA SUR	LAGUNA SUR
	SUB-BASIN ID
	NAME OF MICROBASIN			Guatimape	Presa Tejamen	Tejamen	El Gato	Tinajuelas	Presa Dr Castillo del Valle	Las Jarillas	El Trébol	Torunos	Presa La Redonda	EL Candado	Laguna Norte	Ojo de Lobo	La Tinaja	Los Monos	EL Colorado	Viborillas	Laguna Sur
	TYPE OF SUB-BASIN
	PLACE TO DRAIN			Laguna Norte	Tejamen	Laguna Norte	Laguna Norte	Laguna Norte	Presa Dr Castillo del Valle	Laguna Norte	Laguna Norte	Laguna Norte	Presa La Magdalena	Laguna Norte		Laguna Sur	Laguna Sur	Laguna Sur	Laguna Sur	Laguna Sur	Laguna Sur
	BASIN AREA	Km2	2598.09	353.817	54.1433	238.839	183.87	699.798	16.0583	76.5599	40.7651	121.098	56.143	120.389	81.3843	46.28	109.391	38.8701	147.043	77.4267	136.213
	ANCILLED ANNUAL AVERAGE VOLUME	m3/Year	1.41687e+09	2.04259e+08	3.79058e+07	1.38951e+08	1.14824e+08	3.58816e+08	7.14433e+06	4.21213e+07	2.25376e+07	5.65511e+07	3.73169e+07	7.79186e+07	4.41796e+07	2.37463e+07	5.03574e+07	1.99442e+07	6.79225e+07	3.97276e+07	7.26422e+07
	PRECIPITACION MEDIA	mm		577.303	700.1	581.778	624.482	512.742	444.9	550.174	552.866	466.987	664.676	647.224	542.852	513.1	460.344	513.1	461.923	513.1	533.297
	COEFFICIENT K WEIGHTED			0.23044	0.223087	0.271039	0.268151	0.255746	0.222807	0.254183	0.231417	0.246493	0.223043	0.259692		0.266883	0.264975	0.25875	0.258773	0.278401
	COEFFICIENT OF DISCHARGE			0.0913385	0.0989301	0.125655	0.128976	0.104095	0.0702505	0.107605	0.0893224	0.0910714	0.0949402	0.124706	1	0.11303	0.104518	0.106539	0.099935	0.122224	1
AVERAGE ANNUAL VOLUME OF SCRUBS IN THE BASIN	AVERAGE ANNUAL NATURAL DISTURBANCE VOLUME	Cp	2.56022e+08	1.86567e+07	3.75002e+06	1.74599e+07	1.48096e+07	3.73509e+07	501893	4.53244e+06	2.01312e+06	5.15019e+06	3.54288e+06	9.71693e+06	4.41796e+07	2.68405e+06	5.26324e+06	2.12484e+06	6.78784e+06	4.85569e+06	7.26422e+07
	AVERAGE ANNUAL OCCUPANCY VOLUME FROM THE BASIN UPSTRIM	Ar		0	0	3.60953e+06	0	0	0	416263	0	0	0	3.33009e+06	5.8313e+07	0	0	0	0	0	2.14688e+07
	AVERAGE VOLUME OF TOTAL OCCUPATION IN THE BASIN		3.4316e+08	1.86567e+07	3.75002e+06	2.10694e+07	1.48096e+07	3.73509e+07	501893	4.9487e+06	2.01312e+06	5.15019e+06	3.54288e+06	1.3047e+07	1.02493e+08	2.68405e+06	5.26324e+06	2.12484e+06	6.78784e+06	4.85569e+06	9.4111e+07
	Reservoir				Presa Tejamen				Presa Dr. Castillo del Valle				Presa La Redonda		Laguna Norte
	capacity	m3	10980000		3080000				900000				7000000
	AVERAGE VOLUME OF ENTRY IN STORAGE m3 / year		7.79479e+06		3.75002e+06				501893				3.54288e+06
	IRRIGATION AREAS	Ha	408			300				108
	Watering foil	m/Ha				1.95094				0.694444
	UNITARY IRRIGATION	m3/Ha				19509.4				6944.44
	VOLUMES GENERATED IN AGRICULTURAL IRRIGATION WITH SURFACE WATER	m3/año	1.52371e+06	72066	0	735439	6190.87	1873.71	0	80703.4	0	21857.1	0	589900	0	0	15677.7	0	0	0	0
	VOLUMES GENERATED BY NON-AGRICULTURAL RETURNS		386533	360.604	0	80957.1	179.2	119386	0	40345.9	0	33530	0	23608.2	0	4944.8	12529.3	0	24485.3	46207	0
	VOLUMES OF RETURNS OF SURFACE ORIGIN	Rsup	1.91024e+06	72426.6	0	816396	6370.07	121260	0	121049	0	55387.1	0	613508	0	4944.8	28207	0	24485.3	46207	0
	VOLUMES GENERATED BY GROUNDWATER EXTRACTIONS AGRICULTURAL USE		9.41092e+06	220791	0	1.49115e+06	1.55278e+06	3.87572e+06	0	496115	137485	338481	0	522014	0	2147.58	219221	0	538894	16133.6	0
	VOLUMES GENERATED BY GROUNDWATER EXTRACTIONS OTHER USES		259376	7571.22	0	27794.5	74750.1	58728.6	0	11669.5	1721.9	6823.54	0	48511.4	0	47.631	7355.93	51.682	11804.3	2545.75	0
	VOLUME OF RETURNS OF GROUNDWATER ORIGIN	Rsub	9.67029e+06	228362	0	1.51894e+06	1.62753e+06	3.93444e+06	0	507784	139207	345305	0	570526	0	2195.21	226577	51.682	550698	18679.4	0
	TOTAL VOLUME OF RETURNS	R	1.15805e+07	300789	0	2.33534e+06	1.6339e+06	4.0557e+06	0	628834	139207	400692	0	1.18403e+06		7140.01	254783	51.682	575183	64886.4
	TOTAL SURFACE IN THE BASIN M3 / YEAR		2.67603e+08	1.89575e+07	3.75002e+06	1.97953e+07	1.64435e+07	4.14066e+07	501893	5.16127e+06	2.15232e+06	5.55088e+06	3.54288e+06	1.0901e+07	4.41796e+07	2.69119e+06	5.51802e+06	2.12489e+06	7.36302e+06	4.92057e+06	7.26422e+07
	SCENE COEFFICIENTS
ANNUAL AVERAGE VOLUME IN SUPERFICIAL USE	AGRICULTURAL		12578152	789000	0	5852832	48000	18000	0	750000	0	240000	0	4730320	0	0	150000	0	0	0	0
	DOMESTIC		0	0	0	0	0	0	0	0	0	0	0	0	0	0	0	0	0	0	0
	LIVESTOCK		330080	767	0	34295	0	65610.5	0	57637	0	47900	0	0	0	5475	17899	0	34979	65517	0
	URBAN PUBLIC		227236	4873	0	81358	256	104941	0	0	0	0	0	33726	0	1589	0	0	0	493	0
	SUMMARY USES	Uc	1.31355e+07	794640	0	5968485	48256	188552	0	807637	0	287900	0	4764046	0	7064	167899	0	34979	66010	0
EVAPORATION IN RESERVES	Maximum body surface water	m2	2.26305e+08	255488	382146	2.96734e+06	224605	1.1964e+06	179803	37250.9	31740.5	140882	556633	430515	81384266	72487.5	1.04228e+06	179149	976600	34242.1	136213415
	Annual average of occupation	%		0.5	0.5	0.5	0.5	0.5	0.5	0.5	0.5	0.5	0.5	0.5	0.5	0.4	0.4	0.4	0.4	0.4	0.13
	Half body surface of water		6.25232e+07	127744	191073	1.48367e+06	112303	598200	89901.7	18625.4	15870.2	70441.2	278316	215258	40692133	28995	416911	71659.4	390640	13696.8	1.77077e+07
	Volume variations m3 / year		1.84496e+06		875934				166334				802690
	AVERAGE EVAPORATION mm	1774.2
	NET EVAPORATION		16730.5	841.561	735.295	857.46	822.195	906.766	952.488	875.162	862.651	941.676	764.563	799.623	1366.13	911.03	953.904	907.699	950.374	915.747	1366.13
	EVAPORATED VOLUME ON THE HISTORICAL AVERAGE PACKAGE m3 / year	Ev	8.33768e+07	107504	140495	1.27219e+06	92334.7	542428	85630.3	16300.3	13690.5	66332.8	212790	172125	5.55909e+07	26415.3	397693	65045.2	371254	12542.8	2.41912e+07
	IMPORTS	Im
	EXPORTS	Ex
	Volume Committed Own Basin	Rxx	9.65123e+07	902144	140495	7.24067e+06	140591	730979	85630.3	823937	13690.5	354233	212790	4.93617e+06	5.55909e+07	33479.3	565592	65045.2	406233	78552.8	2.41912e+07		9.65123e+07
	AVERAGE ANNUAL VOLUME DRAINED TO THE BASIN WATER DOWN	Ab	1.7109e+08	1.80554e+07	3.60953e+06	1.25546e+07	1.63029e+07	4.06756e+07	416263	4.33733e+06	2.13863e+06	5.19664e+06	3.33009e+06	5.9648e+06	-1.14113e+07	2.65771e+06	4.95243e+06	2.05984e+06	6.95679e+06	4.84202e+06	4.8451e+07		1.7109e+08
	Distribution of contributions downstream			0.192801	1	0.130148	0.100194	0.381333	1	0.041719	0.0222137	0.0659885	1	0.0656022	1	0.110451	0.261069	0.0927663	0.350929	0.184785
				5.55909e+07	7.24067e+06	5.55909e+07	5.55909e+07	5.55909e+07	823937	5.55909e+07	5.55909e+07	5.55909e+07	4.93617e+06	5.55909e+07		2.41912e+07	2.41912e+07	2.41912e+07	2.41912e+07	2.41912e+07
	ANNUAL MIDDLE VOLUME COMMITTED DOWNSTREAM	Rxy	9.27828e+07	1.0718e+07	7.24067e+06	7.23503e+06	5.5699e+06	2.11986e+07	823937	2.3192e+06	1.23488e+06	3.66836e+06	4.93617e+06	3.64689e+06	0	2.67193e+06	6.31557e+06	2.24412e+06	8.48938e+06	4.47015e+06	0		9.27828e+07
Summary of the surface water balance m3 / year	ANNUAL AVERAGE VOLUME OF CONTRIBUTIONS BY OWN BASIN	Cp	2.56022e+08	1.86567e+07	3.75002e+06	1.74599e+07	1.48096e+07	3.73509e+07	501893	4.53244e+06	2.01312e+06	5.15019e+06	3.54288e+06	9.71693e+06	4.41796e+07	2.68405e+06	5.26324e+06	2.12484e+06	6.78784e+06	4.85569e+06	7.26422e+07
	AVERAGE ANNUAL VOLUME OF CONTRIBUTIONS FROM THE BASIN UPSTRIM	At	8.71377e+07	0	0	3.60953e+06	0	0	0	416263	0	0	0	3.33009e+06	5.8313e+07	0	0	0	0	0	2.14688e+07
	AVERAGE ANNUAL TOTAL SURVEY VOLUME		3.4316e+08	1.86567e+07	3.75002e+06	2.10694e+07	1.48096e+07	3.73509e+07	501893	4.9487e+06	2.01312e+06	5.15019e+06	3.54288e+06	1.3047e+07	1.02493e+08	2.68405e+06	5.26324e+06	2.12484e+06	6.78784e+06	4.85569e+06	9.4111e+07
	AVERAGE ANNUAL VOLUME OF CONSUMER USE	Uc	1.31355e+07	794640	0	5968485	48256	188552	0	807637	0	287900	0	4764046	0	7064	167899	0	34979	66010	0
	AVERAGE ANNUAL RETURN VOLUME	R	1.15805e+07	300789	0	2.33534e+06	1.6339e+06	4.0557e+06	0	628834	139207	400692	0	1.18403e+06		7140.01	254783	51.682	575183	64886.4
	AVERAGE ANNUAL IMPORT VOLUME	Im	0
	AVERAGE ANNUAL EXPORT VOLUME	Ex	0
	ANNUAL VOLUME OF VARIATION IN RESERVES	Av	1.84496e+06	0	875934	0	0	0	166334	0	0	0	802690	0		0	0	0	0	0
	AVERAGE ANNUAL VOLUME EVAPORATED IN WATER BODIES	Ev	8.33768e+07	107504	140495	1.27219e+06	92334.7	542428	85630.3	16300.3	13690.5	66332.8	212790	172125	5.55909e+07	26415.3	397693	65045.2	371254	12542.8	2.41912e+07
	AVERAGE ANNUAL VOLUME DRAINED TO THE BASIN WATER DOWN	Ab	3.36165e+08	1.80554e+07	2.73359e+06	1.61641e+07	1.63029e+07	4.06756e+07	249929	4.7536e+06	2.13863e+06	5.19664e+06	2.5274e+06	9.29488e+06	1.02493e+08	2.65771e+06	4.95243e+06	2.05984e+06	6.95679e+06	4.84202e+06	9.4111e+07
	ANNUAL MIDDLE VOLUME COMMITTED DOWNSTREAM	Rxy	9.27828e+07	1.0718e+07	7.24067e+06	7.23503e+06	5.5699e+06	2.11986e+07	823937	2.3192e+06	1.23488e+06	3.66836e+06	4.93617e+06	3.64689e+06	0	2.67193e+06	6.31557e+06	2.24412e+06	8.48938e+06	4.47015e+06	0
	Availability Total DXX	D	2.53966e+08	7.33738e+06	0	8.92909e+06	1.0733e+07	1.9477e+07	0	2.4344e+06	903756	1.52828e+06	0	5.64799e+06	1.02493e+08	0	0	0	0	371871	9.4111e+07
	Relative availability DR		3.62314	1.68458	0.377533	2.23415	2.92696	1.91878	0.303335	2.04967	1.73186	1.41661	0.512015	2.54872		0.994679	0.784163	0.917883	0.81947	1.08319
	Classification of DR		DISPONIBILIDAD	EQUILIBRIO	DEFICIT	EQUILIBRIO	EQUILIBRIO	EQUILIBRIO	DEFICIT	EQUILIBRIO	EQUILIBRIO	EQUILIBRIO	DEFICIT	EQUILIBRIO		DEFICIT	DEFICIT	DEFICIT	DEFICIT	DEFICIT
	Classification of DR		AVAILABILITY	BALANCE	DEFICIT	BALANCE	BALANCE	BALANCE	DEFICIT	BALANCE	BALANCE	BALANCE	DEFICIT	BALANCE		DEFICIT	DEFICIT	DEFICIT	DEFICIT	DEFICIT
															1.05226e+08						2.14688e+07
	REPDA S Underground
	Urban Public			113832	0	264720	412636	367622	0	134685	27539	85136	0	457208	0	602	66688	0	98065	987	0
	Agricultural			2321280	0	8052463	5.04781e+06	1.95968e+07	0	3236456	330201	2.6863e+06	0	1.58289e+06	0	19000	723365	0	2917155	0	0
	Livestock			4585	0	30838.5	104420	150125	0	6826.5	0	3650	0	40887	0	0	20440.5	693	20075	9490	0
	Domestic			0	0	2781.75	7084	10167	0	0	0	0	0	730	0	0	0	0	0	0	0
	Múltiple			0	0	9080	290236	259777	0	0	0	0	0	48768	0	0	0	0	0	0	0
	Different uses			0	0	0	0	0	0	0	0	0	0	0	0	0	0	0	602.25	19278	0
	Industrial			0	0	0	1825	3582.38	0	0	0	0	0	1460	0	0	0	0	0	0	0
				2439697	0	8.35988e+06	5.86401e+06	2.03881e+07	0	3.37797e+06	357740	2.77509e+06	0	2.13195e+06	0	19602	810494	693	3.0359e+06	29755	0	4.95909e+07
	Abril Doc
	REPDA S UNDERGROUND FOLIO 8
	Urban Public			0	0	0	0	0	0	0	0	0	0	0	0	0	0	0	49000	0	0
	Agricultural			96000	0	3814495	6991412	17635699	0	1374085	1209000	1030353	0	2603060	0	0	1374085	0	2475285	132000	0
	Livestock			0	0	2155	2792	8557	0	13414	0	18250	0	2245	0	0	13414	0	1000	0	0
	Domestic			0	0	6420	8956	5795	0	0	0	0	0	4424	0	0	0	0	0	0	0
	Múltiple			0	0	0	0	0	0	0	0	0	0	0	0	0	0	0	0	0	0
	Different uses			0	0	0	0	0	0	0	0	0	0	0	0	0	0	0	0	0	0
	Industrial			0	0	0	0	350	0	0	0	0	0	0	0	0	0	0	0	0	0
				96000	0	3823070	7003160	17650401	0	1387499	1209000	1048603	0	2609729	0	0	1387499	0	2525285	132000	0	38872246
														2609729
	TOTAL EXTRACCION SUBTERRANEA
	Urban Public			113832	0	264720	412636	367622	0	134685	27539	85136	0	457208	0	602	66688	0	147065	987	0
	Agricultural			2417280	0	11866958	1.20392e+07	3.72325e+07	0	4610541	1539201	3.71666e+06	0	4.18595e+06	0	19000	2097450	0	5392440	132000	0
	Livestock			4585	0	32993.5	107212	158682	0	20240.5	0	21900	0	43132	0	0	33854.5	693	21075	9490	0
	Domestic			0	0	9201.75	16040	15962	0	0	0	0	0	5154	0	0	0	0	0	0	0
	Múltiple			0	0	9080	290236	259777	0	0	0	0	0	48768	0	0	0	0	0	0	0
	Different uses			0	0	0	0	0	0	0	0	0	0	0	0	0	0	0	602.25	19278	0
	Industrial			0	0	0	1825	3932.38	0	0	0	0	0	1460	0	0	0	0	0	0	0
				2535697	0	1.2183e+07	1.28672e+07	3.80385e+07	0	4.76547e+06	1566740	3.82369e+06	0	4.74168e+06	0	19602	2.19799e+06	693	5.56118e+06	161755	0	8.84631e+07
	REPDA SUPERFICIAL
	Urban Public			4873	0	81358	256	104941	0	0	0	0	0	33726	0	1589	0	0	0	493	0
	Agricultural			789000	0	5852832	48000	18000	0	750000	0	240000	0	4730320	0	0	150000	0	0	0	0
	Livestock			767	0	34295	0	65610.5	0	57637	0	47900	0	0	0	5475	17899	0	34979	65517	0
				2439697	0	8.35988e+06	5.86401e+06	2.03881e+07	0	3.37797e+06	357740	2.77509e+06	0	2.13195e+06	0	19602	810494	693	3.0359e+06	29755	0
				794640	0	5968485	48256	188552	0	807637	0	287900	0	4764046	0	7064	167899	0	34979	66010	0
				Vol subterranea	Vol subterranea	Vol subterranea	Vol subterranea	Vol subterranea	Vol subterranea	Vol subterranea	Vol subterranea	Vol subterranea	Vol subterranea	Vol subterranea	Vol subterranea	Vol subterranea	Vol subterranea	Vol subterranea	Vol subterranea	Vol subterranea	Vol subterranea
				2439697		8.55199e+06	5.84275e+06	2.03819e+07		3.28533e+06	373958	2.77509e+06		2.11368e+06		931	821243	12000	3.37602e+06	29426
				Vol Super	Vol Super	Vol Super	Vol Super	Vol Super	Vol Super	Vol Super	Vol Super	Vol Super	Vol Super	Vol Super	Vol Super	Vol Super	Vol Super	Vol Super	Vol Super	Vol Super	Vol Super
				794640		5968485	48256	188552		807637	48255	287900		4764046		7064	167899		34979	66010
				cuerpos de agua	cuerpos de agua	cuerpos de agua	cuerpos de agua	cuerpos de agua	cuerpos de agua	cuerpos de agua	cuerpos de agua	cuerpos de agua	cuerpos de agua	cuerpos de agua	cuerpos de agua	cuerpos de agua	cuerpos de agua	cuerpos de agua	cuerpos de agua	cuerpos de agua	cuerpos de agua
				255488	382146	2.58519e+06	224605	1.1964e+06	179803	37250.9	31740.5	140882	556633	430515		72487.5	1.04228e+06	179149	976600	34242.1	136213415
					2.96734e+06	2.96734e+06
										217054				987148

## Sheet: Underground balance
			REGION			LAGUNA NORTE		LAGUNA NORTE	LAGUNA NORTE	LAGUNA NORTE		LAGUNA NORTE	LAGUNA NORTE	LAGUNA NORTE		LAGUNA NORTE	LAGUNA NORTE	LAGUNA SUR	LAGUNA SUR	LAGUNA SUR	LAGUNA SUR	LAGUNA SUR	LAGUNA SUR
			SUB-BASIN ID
			MICROBASIN NAME			Guatimape		Tejamen	EL Gato	Tinajuelas		Las Jarillas	El Trebol	Torunos		El Candado	Laguna Norte	Ojo de Lobo	La Tinaja	Los Monos	El Colorado	Viborillas	Laguna Sur
			Number	1001
			Aquifer	Valle de Santiaguillo
Natural recharge		SIG	ÁREA METERS	2471743351		3.53817e+08		238838579	183870276	699797535		76559938	40765084	1.21098e+08		120388968	81384266	46280031	1.09391e+08	38870093	147043158	77426713	136213415
		SIG	AREA KM2	2471.74		353.817		238.839	183.87	699.798		76.5599	40.7651	121.098		120.389	81.3843	46.28	109.391	38.8701	147.043	77.4267	136.213
		CALCULATION	RAIN mm			577.303		581.778	624.482	512.742		550.174	552.866	466.987		647.224	542.852	513.1	460.344	513.1	461.923	513.1	533.297
		CALCULATION	RAIN mts
			Volume precipitated out of the aquiferous						3.25776e+07
			Volume rushed at the aquiferous						8.22462e+07
			Volume rushed at water bodies						0
		CLIMATOLOGYCAL LEVELS	AVERAGE ANNUAL VOLUME PRECIPITATED RAIN m3/ year	1.40972e+09		2.04259e+08		1.76857e+08	1.14824e+08	3.58816e+08		4.21213e+07	2.25376e+07	5.65511e+07		1.15236e+08	4.41796e+07	2.37463e+07	5.03574e+07	1.99442e+07	6.79225e+07	3.97276e+07	7.26422e+07
			AVERAGE ANNUAL NATURAL DISTURBANCE VOLUME	2.48227e+08		1.86567e+07		1.74599e+07	1.48096e+07	3.73509e+07		4.53244e+06	2.01312e+06	5.15019e+06		9.71693e+06	4.41796e+07	2.68405e+06	5.26324e+06	2.12484e+06	6.78784e+06	4.85569e+06	7.26422e+07
			AVERAGE ANNUAL TOTAL SURVEY VOLUME	2.59808e+08		1.89575e+07		1.97953e+07	1.64435e+07	4.14066e+07		5.16127e+06	2.15232e+06	5.55088e+06		1.0901e+07	4.41796e+07	2.69119e+06	5.51802e+06	2.12489e+06	7.36302e+06	4.92057e+06	7.26422e+07
			EVAPORATED ANNUAL VOLUME OF RESERVOIRS	8.29379e+07		107504		1.27219e+06	92334.7	542428		16300.3	13690.5	66332.8		172125	5.55909e+07	26415.3	397693	65045.2	371254	12542.8	2.41912e+07
			ANNUAL VOLUME STORED IN RESERVES	0		0		0	0	0		0	0	0		0	0	0	0	0	0	0	0
			% infiltration / precipitation	0.0112		0.0041		0.00716918	0.00946442	0.0149626		0.0182538	0.0221737	0.0193416		0.00349846	0	0.010744	0.0111412	0.0103842	0.017831	0.00810283	0
			ANNUAL NATURAL INFILTRATED VOLUME M3 / YEAR	1.57889e+07		837464		1.26792e+06	1.08674e+06	5.36882e+06		768872	499743	1.09379e+06		403146	0	255130	561042	207106	1.21113e+06	321906	0
			Infiltration coefficient			0.0441758		0.0640516	0.0660895	0.129661		0.148969	0.232188	0.197048		0.0369826		0.0948018	0.101674	0.0974666	0.164488	0.0654205
Horizontal entries		ETJ	m3/year	10541133
Horizontal Outputs		Sh	Subsoil	264902
		Shs	Surface	10393000
			Natural discharge	10657902
Recharge for irrigation returns		Irrigation returns M3/AÑO	m3/año	21050902		72066		735439	6190.87	1873.71		80703.4	0	21857.1		589900	0	0	15677.7	0	0	0	0
		Extractions agricultural use	m3/año	31708804		2321280		8052463	5.04781e+06	1.95968e+07		3236456	330201	2.6863e+06		1.58289e+06	0	19000	723365	0	2917155	0	0
		Extractions other uses	m3/año
		Total volume of returns	m3/año	52759706		2.39335e+06		8.7879e+06	5.054e+06	1.95987e+07		3.31716e+06	330201	2.70816e+06		2.17279e+06	0	19000	739043	0	2917155	0	0
		Infiltration %	ETJ	0.07		0.07		0.07	0.07	0.07		0.07	0.07	0.07		0.07	0.07	0.07	0.07	0.07	0.07	0.07	0.07
		Induced Recharge	Ir (m3/año)	3.69318e+06		167534		615153	353780	1.37191e+06		232201	23114.1	189571		152096	0	1330	51733	0	204201	0	0
Evapotranspiracion (Coutange)		Average rainfall / 1000	P	0.570335		0.577303		0.581778	0.624482	0.512742		0.550174	0.552866	0.466987		0.647224	0.542852	0.5131	0.460344	0.5131	0.461923	0.5131	0.533297
		Area of ​​shallow levels	A (km2)	220													81.3843						136.213
		Average annual temperature	t	16.7		16.963		17.16	16.89	16.96		14.2944	14.21	14.9		16.967	17.36	15.9	17.2924	15.9	17.25	14.9	16.8
		X=1/(0.8+0.14t)	Q (m3/s)	0.318674		0.314978		0.312266	0.315996	0.31502		0.356988	0.3585	0.3465		0.314924	0.309559	0.330469	0.310469	0.330469	0.311042	0.3465	0.317259
		ETR= P-XP2	ETR	0.466676		0.472327		0.476087	0.501251	0.429922		0.442116	0.443287	0.391423		0.515303	0.451628	0.426097	0.39455	0.426097	0.395555	0.421876	0.443067
		Incidence %		0.14		0.14		0.14	0.14	0.14		0.14	0.14	0.14		0.14	0.14	0.14	0.14	0.14	0.14	0.14	0.14
		EVT= ETR x A x Incidence	m3/año	1.43736e+07		925758		1.7346e+06	1.32694e+06	6.20925e+06		922142	481632	1.18217e+06		511463	0	236239	564460	190776	1.30373e+06	296525	8.44923e+06
		Percentage of evapotranspiration / infiltration		0.910363		0.921153		0.921153	0.921153	0.921153		0.921153	0.921153	0.921153		0.921153	0.921153	0.921153	0.921153	0.921153	0.921153	0.921153
		AGRICULTURAL	REPDA m3/año	8.52492e+07		2417280	0	11866958	1.20392e+07	3.72325e+07	0	4610541	1539201	3.71666e+06	0	4.18595e+06	0	19000	2097450	0	5392440	132000	0
		INDUSTRIAL	REPDA m3/año	7217.38		0	0	0	1825	3932.38	0	0	0	0	0	1460	0	0	0	0	0	0	0
		DOMESTIC	REPDA m3/año	46357.8		0	0	9201.75	16040	15962	0	0	0	0	0	5154	0	0	0	0	0	0	0
		LIVESTOCK	REPDA m3/año	453858		4585	0	32993.5	107212	158682	0	20240.5	0	21900	0	43132	0	0	33854.5	693	21075	9490	0
		PUBLIC URBAN	REPDA m3/año	2078720		113832	0	264720	412636	367622	0	134685	27539	85136	0	457208	0	602	66688	0	147065	987	0
		MULTIPLE	REPDA m3/año	607861		0	0	9080	290236	259777	0	0	0	0	0	48768	0	0	0	0	0	0	0
		DIFERENT USES	REPDA m3/año	19880.2		0	0	0	0	0	0	0	0	0	0	0	0	0	0	0	602.25	19278	0
		AGRICULTURAL	folio 8 m3/año	38735474		96000	0	3814495	6991412	17635699	0	1374085	1209000	1030353	0	2603060	0	0	1374085	0	2475285	132000	0
		INDUSTRIAL	folio 8 m3/año	350		0	0	0	0	350	0	0	0	0	0	0	0	0	0	0	0	0	0
		DOMESTIC	folio 8 m3/año	25595		0	0	6420	8956	5795	0	0	0	0	0	4424	0	0	0	0	0	0	0
		LIVESTOCK	folio 8 m3/año	61827		0	0	2155	2792	8557	0	13414	0	18250	0	2245	0	0	13414	0	1000	0	0
		PUBLIC URBAN	folio 8 m3/año	49000		0	0	0	0	0	0	0	0	0	0	0	0	0	0	0	49000	0	0
		MULTIPLE	folio 8 m3/año	0		0	0	0	0	0	0	0	0	0	0	0	0	0	0	0	0	0	0
		DIFERENT USES		0		0	0	0	0	0	0	0	0	0	0	0	0	0	0	0	0	0	0
		TOTAL REPDA		8.84631e+07		2535697		1.2183e+07	1.28672e+07	3.80385e+07		4.76547e+06	1566740	3.82369e+06		4.74168e+06	0	19602	2.19799e+06	693	5.56118e+06	161755	0
		TOTAL FOLIO 8		38872246		96000		3823070	7003160	17650401		1387499	1209000	1048603		2609729	0	0	1387499	0	2525285	132000	0
		TOTAL CONCESSIONED USE	B (m3/año)	1.27335e+08		2631697		1.6006e+07	1.98703e+07	5.56889e+07		6.15297e+06	2775740	4.8723e+06		7.35141e+06	0	19602	3.58549e+06	693	8.08647e+06	293755	0
Underground balance		Rain infiltration	Ip	1.57889e+07		837464		1.26792e+06	1.08674e+06	5.36882e+06		768872	499743	1.09379e+06		403146	0	255130	561042	207106	1.21113e+06	321906	0
		Infiltration for returns	Ir	3.69318e+06		167534		615153	353780	1.37191e+06		232201	23114.1	189571		152096	0	1330	51733	0	204201	0	0
		Horizontal entry	Eh	10541133		2.09615e+06		1.00826e+06	405435	2.03726e+06		311763	146083	411983		480985	0	181599	300606	183539	426643	142098	0
		Horizontal Discharge	Sh	264902		0		0	0	0		0	0	0		0	0	0	0	0	0	0	0
		Evapotranspiration	Evt	1.43736e+07	0	1.82669e+08		1.53371e+08	9.8522e+07	3.14059e+08		3.60063e+07	1.98787e+07	4.98951e+07		1.01092e+08	0	236239	564460	190776	1.30373e+06	296525	8.44923e+06
		Annual average total recharge		3.00232e+07		3.10115e+06		2.89133e+06	1.84595e+06	8.77799e+06		1.31284e+06	668940	1.69534e+06		1.03623e+06	0	438059	913381	390645	1.84197e+06	464004	0
		Natural discharge committed		1.46385e+07		1.82669e+08		1.53371e+08	9.8522e+07	3.14059e+08		3.60063e+07	1.98787e+07	4.98951e+07		1.01092e+08	0	236239	564460	190776	1.30373e+06	296525	8.44923e+06
		Underground volume concession	B	1.27335e+08		2631697		1.6006e+07	1.98703e+07	5.56889e+07		6.15297e+06	2775740	4.8723e+06		7.35141e+06	0	19602	3.58549e+06	693	8.08647e+06	293755	0
		Underground availability	Dm	-1.11951e+08		-1.822e+08		-1.66485e+08	-1.16546e+08	-3.6097e+08		-4.08464e+07	-2.19855e+07	-5.30721e+07		-1.07407e+08	0	182218	-3.23657e+06	199176	-7.54823e+06	-126276	-8.44923e+06
			% human exploitation / recharge	4.24123		0.84862		5.53587	10.7643	6.34415		4.68677	4.14946	2.87393		7.0944	#DIV/0!	0.0447474	3.92552	0.00177399	4.39012	0.633088	#DIV/0!

## Sheet: Availability
Microbasin	Drained Volume	Surface concession volume	Surface volume agricultural use	%	Agricultural production Ton	m3 water / ton production ratio	Surface volume livestock use	%	Livestock production	m3 superficial water / ton meat	Superficial volume urban public use	%	Population	LHD Endowment					Microbasin	Drained Volume	Underground volume agricultural use	%	Agricultural production Ton	m3 water / ton production ratio	UndergroundVolume livestock use	%	Livestock production ton	m3 groundwater/ ton meat ratio	Volumen subterraneo Uso Publico Urbano	Underground urban public use volume	Population	LHD Endowment		Microbasin	Natural superficial availability percapita	Level of natural water availability percapita (Shiklomanov, 2002)	Availability to development	Level of development availability (Shiklomanov, 2002)		Microbasin	Groundwater extraction percapita	Level of natural water availability percapita (Shiklomanov, 2002)	Over concesion		Availability to development	Level of natural water availability percapita (Shiklomanov, 2002)
Guatimape	1.86567e+07		789000	0.0422903		0	767	4.11111e-05			4873	0.000261192	1386	9.63253					Guatimape	414094	2513280	6.06934		0	4585	0.0110724			113832	0.274894	1386	225.013		Guatimape	13460.9	High	5293.93	Medium		Guatimape	2237.48	Low	0.84862		-131457	Catastrophically Low
Tejamen	2.12099e+07		5852832	0.275948		0	34295	0.00161693			81358	0.00383584	3491	63.8495					Tejamen	2.27618e+06	15681453	6.88938		0	39413.5	0.0173157			264720	0.1163	3491	207.751		Tejamen	6075.61	Medium	2557.74	Low		Tejamen	828.224	Catastrophically Low	5.53587		-47689.9	Catastrophically Low
El Gato	1.48096e+07		48000	0.00324115		0	0	0			256	1.72861e-05	12234	0.0573296					El Gato	1.49217e+06	1.90306e+07	12.7536		0	116168	0.0778515			412636	0.276533	12234	92.4072	92.4645	El Gato	1210.52	Very Low	877.306	Catastrophically Low		El Gato	150.887	Catastrophically Low	10.7643		-9526.43	Catastrophically Low
Tinajuelas	3.73509e+07		18000	0.000481916		0	65610.5	0.0017566			104941	0.0028096	9288	30.955					Tinajuelas	7.40608e+06	5.48682e+07	7.40854		0	164477	0.0222084			367972	0.0496851	9288	108.542	139.497	Tinajuelas	4021.41	Low	2097	Low		Tinajuelas	945.089	Catastrophically Low	6.34415		-38864.1	Catastrophically Low
Las Jarillas	5.03433e+06		750000	0.148977		0	57637	0.0114488			0	0	1670	0					Las Jarillas	1.08064e+06	5984626	5.53806		0	20240.5	0.0187302			134685	0.124635	1670	220.958		Las Jarillas	3014.57	Low	1457.72	Very Low		Las Jarillas	786.13	Catastrophically Low	4.68677		-24458.9	Catastrophically Low
El Trébol	2.01312e+06		0	0		#DIV/0!	0	0			0	0	372	0					El Trébol	645826	2748201	4.25532		0	0	0			27539	0.0426415	372	202.821	202.821	El Trébol	5411.61	Medium	2429.45	Low		El Trébol	1798.23	Very Low	4.14946		-59100.8	Catastrophically Low
Torunos	5.15019e+06		240000	0.0466003		0	47900	0.00930064			0	0	882	0					Torunos	1.50577e+06	4.74701e+06	3.15254		0	21900	0.014544			85136	0.0565397	882	264.455		Torunos	5839.21	Medium	1732.75	Very Low		Torunos	1922.16	Very Low	2.87393		-60172.4	Catastrophically Low
El Candado	1.32598e+07		4730320	0.356741		0	0	0			33726	0.00254348	928	99.569					EL Candado	884131	6.78901e+06	7.67874		0	47556	0.0537884			457208	0.517127	928	1349.81		El Candado	14288.6	High	6086.2	Medium		El Candado	1116.62	Very Low	7.0944		-115740	Catastrophically Low
Ojo de Lobo	2.68405e+06		0	0		#DIV/0!	1589	0.000592015			1589	0.000592015	5	870.685					Ojo de Lobo	436729	19000	0.0435052		0	0	0			602	0.00137843	5	329.863		Ojo de Lobo	536810	Very High	0	Catastrophically Low		Ojo de Lobo	87611.8	Very High	0.0447474		36443.6	Very High
La Tinaja	5.26324e+06		150000	0.0284995		0	17899	0.00340076			0	0	868	0					La Tinaja	861648	3471535	4.02895		0	33854.5	0.0392904			66688	0.0773959	868	210.492		La Tinaja	6063.64	Medium	0	Catastrophically Low		La Tinaja	1052.28	Very Low	3.92552		-3728.77	Catastrophically Low
Los Monos	2.12484e+06		0	0		#DIV/0!	0	0			0	0	51	0					Los Monos	390645	0	0		#DIV/0!	693	0.00177399			0	0	51	0		Los Monos	41663.5	Very High	0	Catastrophically Low		Los Monos	7659.71	Medium	0.00177399		3905.41	Low
EL Colorado	6.78784e+06		0	0		#DIV/0!	34979	0.00515319			0	0	1762	0					EL Colorado	1.63777e+06	7867725	4.80392		0	21075	0.0128681			147065	0.0897958	1762	228.671		El Colorado	3852.35	Low	0	Catastrophically Low		El Colorado	1045.39	Very Low	4.39012		-4283.9	Catastrophically Low
Viborillas	4.85569e+06		0	0		#DIV/0!	65517	0.0134928			493	0.00010153	118	11.4465					Viborillas	464004	264000	0.568961		0	9490	0.0204524			987	0.00212714	118	22.9162		Viborillas	41149.9	Very High	3151.45	Low		Viborillas	3932.24	Low	0.633088		-1070.14	Catastrophically Low
	1.392e+08
